# Supplementary material for: Temporal Trends in Apparent Food Consumption in Bangladesh: A Joinpoint Regression Analysis of FAO’s Food Balance Sheet Data from 1961 to 2013
Source: PubMed Central journal article supplement (PMC6723082; doi:10.3390/nu11081864), 2019-08-10
Supplement: nutrients-11-01864-s001.pdf [file nutrients-11-01864-s001.pdf]

## Supplementary Table S1

Table S1: Food items grouped into the eleven food groups

| Food groups             | Food items                 | Comment                                                                                                                   |
|-------------------------|----------------------------|---------------------------------------------------------------------------------------------------------------------------|
| <b>Cereals</b>          | Rice                       |                                                                                                                           |
|                         | Wheat and products         |                                                                                                                           |
|                         | Barley and products        |                                                                                                                           |
|                         | Maize and products         |                                                                                                                           |
|                         | Millet and products        |                                                                                                                           |
|                         | Sorghum and products       |                                                                                                                           |
|                         | Cereals, other             |                                                                                                                           |
|                         | Oats                       |                                                                                                                           |
| <b>Starchy roots</b>    | Potatoes and products      |                                                                                                                           |
|                         | Sweet potatoes             |                                                                                                                           |
|                         | Cassava and products       |                                                                                                                           |
|                         | Roots, others              |                                                                                                                           |
| <b>Pulses</b>           | Pulses, other and products |                                                                                                                           |
|                         | Beans                      |                                                                                                                           |
|                         | Peas                       |                                                                                                                           |
| <b>Fish</b>             | Freshwater fish            | Cephalopods <sup>4</sup> and the Molluscs, other these two groups have zero food supply (g/day/person) from 1961 to 2013. |
|                         | Demersal fish <sup>1</sup> |                                                                                                                           |
|                         | Pelagic fish <sup>2</sup>  |                                                                                                                           |
|                         | Marine fish, other         |                                                                                                                           |
|                         | Crustaceans <sup>3</sup>   |                                                                                                                           |
| <b>Eggs</b>             | Eggs                       | No categorization is given <sup>5</sup>                                                                                   |
| <b>Meat<sup>6</sup></b> | Bovine meat                | Pig meat has zero food supply (g/day/person) from 1961 to 2013.                                                           |
|                         | Mutton and goat meat       |                                                                                                                           |
|                         | Poultry meat               |                                                                                                                           |
|                         | Meat, other                |                                                                                                                           |
| <b>Vegetables</b>       | Vegetables, other          |                                                                                                                           |
|                         | Tomatoes and products      |                                                                                                                           |
|                         | Onions                     |                                                                                                                           |
| <b>Fruits</b>           | Orange, mandarins          |                                                                                                                           |
|                         | Lemon, limes and products  |                                                                                                                           |
|                         | Grapefruit and products    |                                                                                                                           |
|                         | Citrus, other              |                                                                                                                           |
|                         | Bananas                    |                                                                                                                           |
|                         | Apples and products        |                                                                                                                           |
|                         | Pineapples and products    |                                                                                                                           |
|                         | Grapes and products        |                                                                                                                           |
|                         | Dates                      |                                                                                                                           |
|                         | Fruits, other              |                                                                                                                           |

|                       |                                                                                                                                                                                        |                                                                                 |
|-----------------------|----------------------------------------------------------------------------------------------------------------------------------------------------------------------------------------|---------------------------------------------------------------------------------|
| <b>Milk</b>           | Milk excluding butter                                                                                                                                                                  | No categorization is given <sup>5</sup>                                         |
| <b>Vegetable oils</b> | Soya bean oil<br>Ground nut oil<br>Sunflower seed oil<br>Rape and mustard oil<br>Cottonseed oil<br>Palm oil<br>Coconut oil<br>Sesame seed oil<br>Rice bran oil<br>Oil crops oil, other | Olive and Maize germ oil have zero food supply (g/day/person) from 1961 to 2013 |
| <b>Sugar</b>          | Sugar non-centrifugal <sup>7</sup><br>Sugar (raw equivalent)<br>Sweeteners, other                                                                                                      | Honey has zero food supply (g/day/person) from 1961 to 2013                     |

<sup>1</sup>Demersal fish are fishes that live and feed near the bottom of seas and lakes such as eel and North American catfish etc. <sup>2</sup>Pelagic fish live in the pelagic zone of the ocean or lakes, neither close to the bottom nor near the shore such as tuna, pomfret, and mackerels etc. <sup>3</sup>Crustaceans includes crabs, shrimps, lobsters, and prawns. <sup>4</sup>Cephalopods included squid and octopus. <sup>5</sup>Eggs and milk groups have no specific further categorization in the FAOSTAT database. <sup>6</sup>Meat and offal consumption were added to make this one group. <sup>7</sup>Non-centrifugal sugars include jaggery and gur.
